# Supplementary material for: FXR promotes clear cell renal cell carcinoma carcinogenesis via MMP-7-regulated EMT pathway
Source: PubMed Central journal article supplement — Sci Rep. 2024 Nov 27;14:29411. doi: 10.1038/s41598-024-80368-4 (PMC11599922; doi:10.1038/s41598-024-80368-4), 2024-11-27

### 1. Primer

| oligo Name       | Sequence(5' to 3')             |
|------------------|--------------------------------|
| <b>F-FXR</b>     | tgc aga tca gac cgt gaa tga    |
| <b>R-FXR</b>     | ttg gtt gcc att tcc gtc aaa    |
| <b>F-GAPDH</b>   | tgc acc acc aac tgc tta gc     |
| <b>R-GAPDH</b>   | ggc atg gac tgt ggt cat gag    |
| <b>F-B-actin</b> | gcg cca tlt taa gcc tet cg     |
| <b>R-B-actin</b> | ggc cat gtc caa ctc cat ca     |
| <b>F-MMP-2</b>   | tct cct gac att gac ctt ggc    |
| <b>R-MMP-2</b>   | caa ggt gct ggc tga gta gatc   |
| <b>F-MMP-7</b>   | gat ggt agt tat gtg att tat tg |
| <b>R-MMP-7</b>   | tcc cac clc cla aaa caa ca     |
| <b>F-MMP-9</b>   | gtg gac age cga cac taa ag     |
| <b>R-MMP-9</b>   | gtc gcg gca agt tca gag        |

### 2. Antibody

| Gene name  | Product name            | source of goods | Product Code |
|------------|-------------------------|-----------------|--------------|
| FXR        | FXR Monoclonal Antibody | Invitrogen      | A9033A       |
| MMP-7      | MMP7                    | Wanleibio       | WL04679      |
| GAPDH      | GAPDH (A-3)             | Santa cruz      | sc-137179    |
| E-cadherin | E-Cadherin              | Wanleibio       | WL01482      |
| N-cadherin | N-Cadherin              | Wanleibio       | WL01047      |
| Vimentin   | Vimentin                | Wanleibio       | WL01960      |
| Claudin    | Claudin 1               | Wanleibio       | WL03073      |
| Twist      | Twist1                  | Wanleibio       | WL00997      |

### 3. Plasmid

| oligo Name   | Sequence                |                         |
|--------------|-------------------------|-------------------------|
|              | sense (5'-3')           | antisense (5'-3')       |
| FXR<br>(1)   | GCCUCUGGAUACCACUAUAAU   | AUUAAUAGUGGUAUCCAGAGGC  |
| FXR<br>(2)   | CCUCAGGAAAUAACAAAUAAU   | AAUAAUUUGUAAUUUCCUGAGG  |
| FXR<br>(3)   | GCCUGACUGAAUUACGGACAU   | AUGUCCGUAAUUCAGUCAGGC   |
| MMP<br>7-248 | CCUACCUAUAACUGGAAUGUUTT | AACAUUCCAGUUAUAGGUAGGTT |
| MMP<br>7-409 | CGCAUAAUACAGUGGAUCGAUTT | AUCGAUCCACUGUAAUAUGCGTT |
| MMP          | CCAGGAUGAUAAUAAAGGCAUTT | AUGCCUUAAUAUCAUCCUGGTT  |

#### 4. Original blots in the manuscript

Related to Figure. 1c

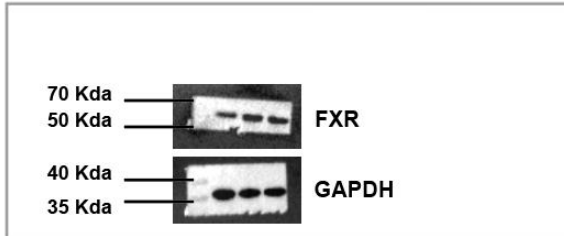

Related to Figure. 1E

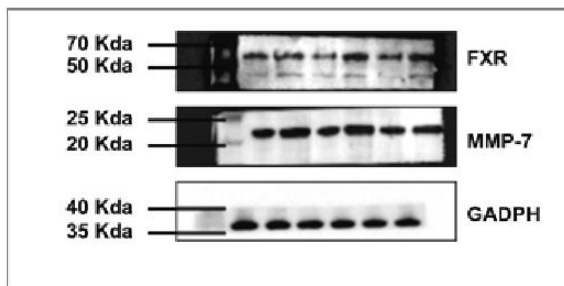

Related to Figure. 2A

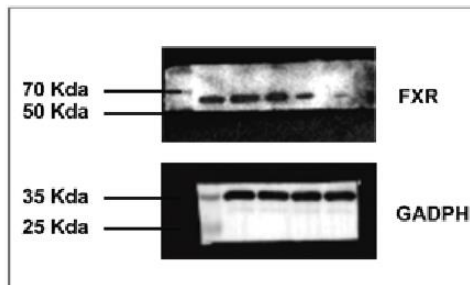

Related to Figure. 2E

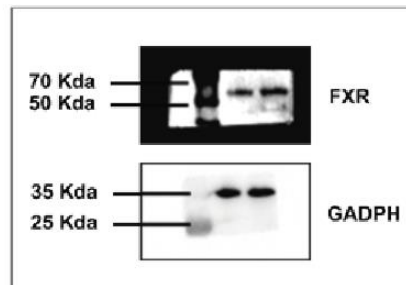

Related to Figure. 3A

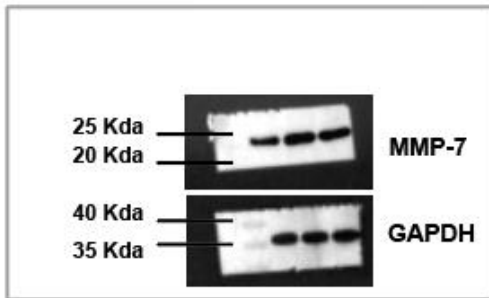

Related to Figure. 3D

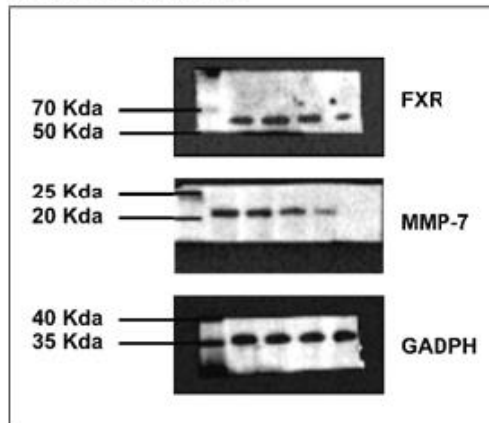

Related to Figure. 3F

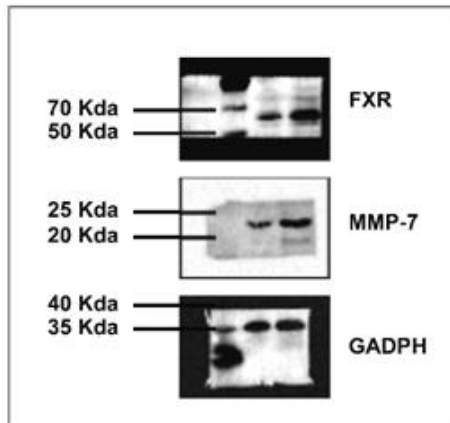

Related to Figure. 4A

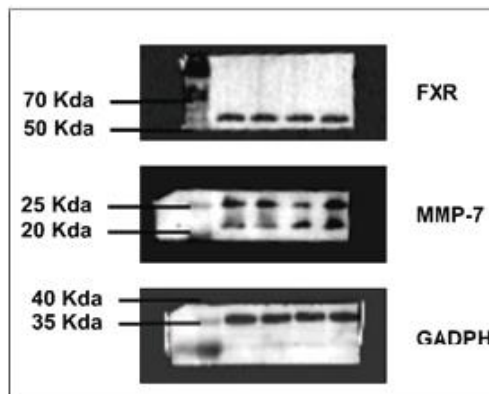

Related to Figure. 4F

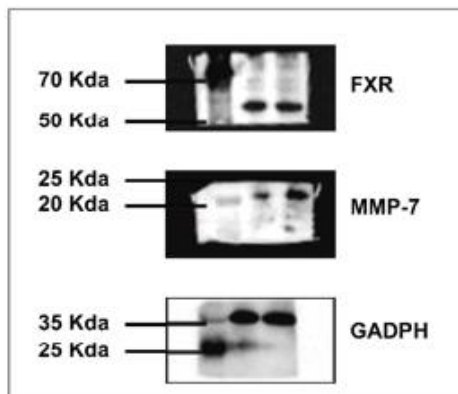

Related to Figure. 5A

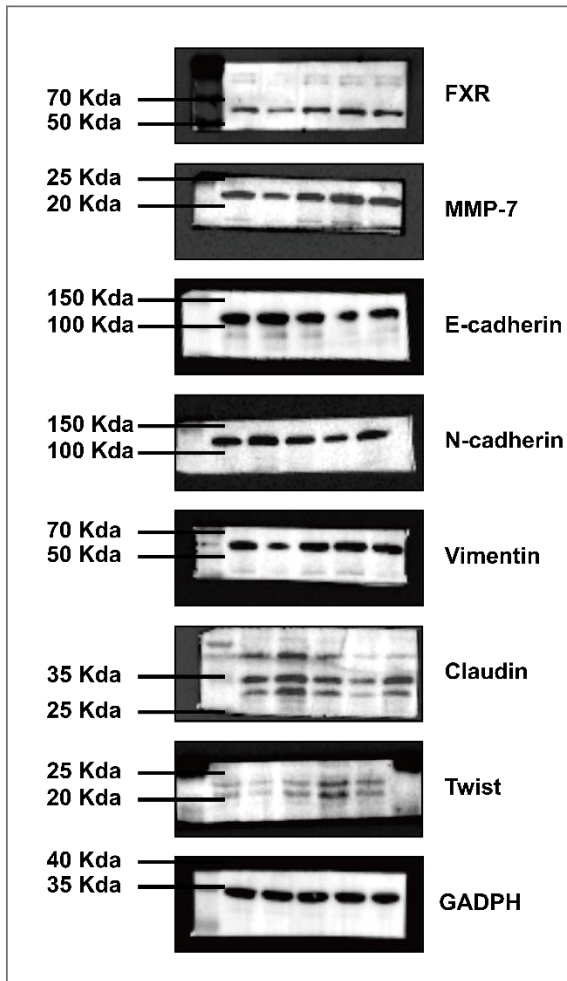

Related to Figure. S1A

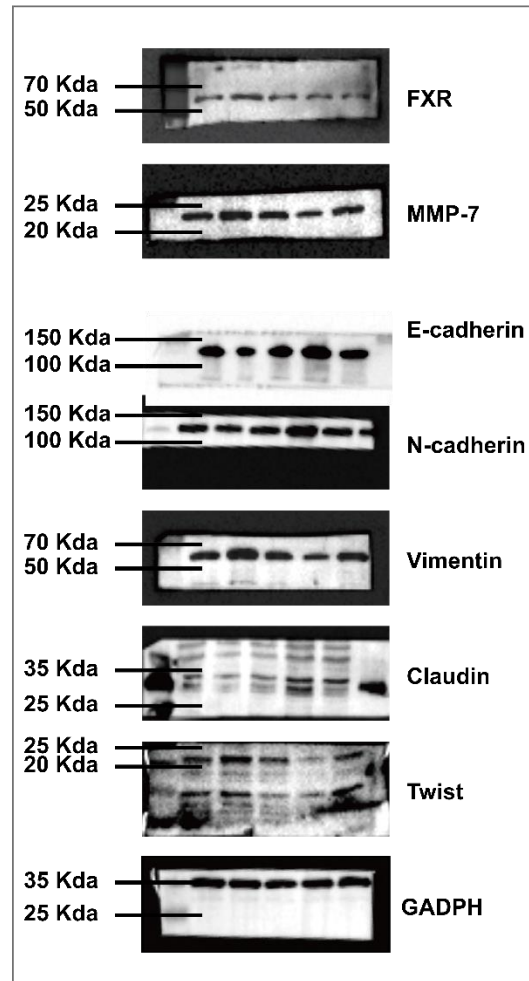

Supplement: 41598_2024_80368_MOESM1_ESM.pdf [file 41598_2024_80368_MOESM1_ESM.pdf]
